## RESEARCH ARTICLE

# Factors associated with mortality in patients hospitalized for COVID-19 admitted to a tertiary hospital in Lambayeque, Peru, during the first wave of the pandemic

Edwin Aguirre-Milachay <sup>1,2</sup>, Darwin A. León-Figueroa <sup>2,3</sup>, Marisella Chumán-Sánchez <sup>2,4</sup>, Luccio Romani <sup>2,3</sup>, Fernando M. Runzer-Colmenares <sup>5\*</sup>

**1** Servicio de Geriatría, Departamento de Medicina, Hospital Nacional Almanzor Aguinaga Asenjo, Chiclayo, Peru, **2** Facultad de Medicina Humana, Universidad de San Martín de Porres, Chiclayo, Peru, **3** Emerge, Unidad de Investigación en Enfermedades Emergentes y Cambio Climático, Facultad de Salud Pública y Administración, Universidad Peruana Cayetano Heredia, Lima, Peru, **4** Sociedad Científica de Estudiantes de Medicina Veritas (SCIEMVE), Chiclayo, Perú, **5** CHANGE Research Working Group, Carrera de Medicina Humana, Universidad Científica del Sur, Lima, Peru

\* [frunzer@cientificadelsur.edu.pe](mailto:frunzer@cientificadelsur.edu.pe)

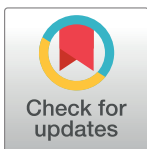

## OPEN ACCESS

**Citation:** Aguirre-Milachay E, León-Figueroa DA, Chumán-Sánchez M, Romani L, Runzer-Colmenares FM (2023) Factors associated with mortality in patients hospitalized for COVID-19 admitted to a tertiary hospital in Lambayeque, Peru, during the first wave of the pandemic. PLoS ONE 18(5): e0285133. <https://doi.org/10.1371/journal.pone.0285133>

**Editor:** Kovy Arteaga-Livias, Universidad Nacional Hermilio Valdizan Escuela Academico Profesional de Medicina Humana, PERU

**Received:** October 13, 2022

**Accepted:** April 15, 2023

**Published:** May 11, 2023

**Peer Review History:** PLOS recognizes the benefits of transparency in the peer review process; therefore, we enable the publication of all of the content of peer review and author responses alongside final, published articles. The editorial history of this article is available here: <https://doi.org/10.1371/journal.pone.0285133>

**Copyright:** © 2023 Aguirre-Milachay et al. This is an open access article distributed under the terms of the [Creative Commons Attribution License](https://creativecommons.org/licenses/by/4.0/), which permits unrestricted use, distribution, and reproduction in any medium, provided the original author and source are credited.

## Abstract

### Introduction

COVID-19 caused by Severe Acute Respiratory Syndrome Coronavirus 2 (SARS-CoV-2) has spread worldwide, becoming a long-term pandemic.

### Objectives

To analyze the factors associated with mortality in patients hospitalized for COVID-19 in a tertiary hospital in the Lambayeque region of Peru.

### Methods

A retrospective cohort study of patients with a diagnosis of COVID-19, hospitalized in a hospital in northern Peru, was conducted from March to September 2020.

### Results

Of the 297 patients studied, 69% were women, the mean age was 63.99 years (SD = ±15.33 years). Hypertension was the most frequent comorbidity (36.67%), followed by diabetes mellitus (24.67%) and obesity (8.33%). The probability of survival at 3 days of ICU stay was 65.3%, at 7 days 24.2%, and 0% on day 14. Risk factors associated with mortality in patients hospitalized for COVID-19 are age, male sex, tachypnea, low systolic blood pressure, low peripheral oxygen saturation, impaired renal function, elevated IL-6 and elevated D-dimer.

### Conclusions

Mortality in hospitalized patients with COVID-19 was 51.18 per 100 persons, Mortality was found to be associated with hypertension, type of infiltrating, and sepsis.

**Data Availability Statement:** The dataset is publicly available and was uploaded to the Figshare platform (<https://doi.org/10.6084/m9.figshare.21664172.v1>), the information was encrypted to protect the privacy of the research participants.

**Funding:** This research received no external funding.

**Competing interests:** The authors have declared that no competing interests exist.

## 1. Introduction

Coronavirus Disease 2019 (COVID-19) caused by Severe Acute Respiratory Syndrome Coronavirus 2 (SARS-CoV-2) has spread globally, becoming a long-lasting pandemic [1]. By December 1, 2022, the World Health Organization (WHO) has reported more than six million deaths due to COVID-19 [2], in Peru, more than 217,370 deaths due to the disease have been reported by 2022, with an estimated case fatality rate of 5.14% [3].

Risk factors associated with mortality in patients hospitalized for COVID-19 are age, male sex, tachypnea, low systolic blood pressure, low peripheral oxygen saturation, impaired renal function, elevated IL-6, elevated D-dimer, and elevated troponin [4, 5]. In addition, the presence of comorbidities such as hypertension, coronary heart disease, and diabetes was associated with a significantly increased risk of death among patients with COVID-19 [4, 6].

About 5–32% of patients hospitalized for COVID-19 require admission to the intensive care unit (ICU), mainly for acute hypoxemic respiratory failure [7–10]. Acute respiratory distress syndrome (ARDS) is diagnosed in 40–96% of ICU patients and 30–88% of them need invasive mechanical ventilation (IVM) [9–15].

Reported ICU mortality ranges from 16 to 78% depending on patient and health system characteristics and the percentage of patients still in the ICU at the end of follow-up [9, 11–13, 15, 16]. In particular, ICU mortality in patients receiving IVM is consistently higher, reaching values of up to 88% [17].

The aim of this study was to analyze the factors associated with mortality in patients hospitalized for COVID-19 in a tertiary hospital in the Lambayeque region. For this purpose, we describe the clinical, epidemiological, laboratory, and imaging characteristics, pharmacological treatments, and ventilatory support in patients hospitalized for COVID-19, which allows us to establish a prognostic model based on the diversity of parameters studied that helps us to strengthen the main variables except for immunization, which influenced the main adverse outcome in a Peruvian population during the first wave of COVID-19, relevant information for future outbreaks in non-immunized population or with incomplete vaccination schedules.

## 2. Materials and methods

### 2.1. Study design and study population

A retrospective cohort study was conducted during the first wave of the COVID-19 pandemic in Peru at the Hospital Nacional Almanzor Aguinaga Asenjo (HNAAA). The HNAAA is a hospital of the third level of care of the Peruvian Social Security (EsSalud), located in the city of Chiclayo, Peru.

The study period comprised the months of March to September 2020, corresponding to the first wave of deaths due to COVID-19 in Peru, which included the first peak of mortality due to the disease.

The sample was obtained based on the study by Hueda-Zavaleta et al [18], using the EPI-DAT 4 statistical package. 2, determined based on oxygen saturation (< 90%) with a proportion of exposed 30.3% and a proportion not exposed of 13.773%, with a non-exposed/exposed index of 1, a confidence level of 95%, a power of 80%, a significance level of 5%. The sample obtained was 196, adding a 20% loss to the data, we obtain 235.

The study included all patients diagnosed with COVID-19, by serological rapid test (RP) (IgM and/or IgG) or molecular test by reverse transcriptase polymerase chain reaction (RT-PCR) analysis, hospitalized at HNAAA during the study period.

## 2.2. Data collection

Data were collected by reviewing the patient's electronic medical records. The variables of interest were recorded in a Microsoft Excel® spreadsheet independently by two authors. The outcome was hospital discharge or death of the patients.

In addition, age, sex, time of illness, COVID-19 diagnostic method, laboratory characteristics at hospital admission, imaging data, mortality, and ICU admission criteria defined by the presence of 3 or more criteria were considered: Moderate-severe dyspnea with signs of work of breathing and use of accessory musculature or paradoxical abdominal movement,  $FR > 30$ ,  $o_2$  saturation less than 92 with use of high flow oxygen therapy,  $PAFIO_2$  less than 150, Lactate greater than 2mm/l or capillary refill greater than 2 sec without response to fluid therapy, MAP less than 65mmHg without response to fluid therapy, Organ dysfunction: mental confusion, renal, cardiological and/or hepatic abnormality, Chest CT scan with greater than 50% compromise.

In addition, days from diagnosis to ICU admission, comorbidities, days of ventilatory support, treatment before hospitalization, in-hospital treatment, complications such as Mild-Moderate Respiratory Distress Syndrome, Severe Respiratory Distress Syndrome, Sepsis/Septic Shock, which were determined by an intensivist physician and obtained through medical records during follow-up, and days of ICU stay.

## 2.3. Statistical analysis

For the descriptive analysis, we used absolute and relative frequencies, measures of central tendency and dispersion, previously evaluating normality with histograms and Shapiro-Wilk. The bivariate analysis was performed using the Chi-square test or Fisher's exact test for categorical variables, and Mann-Whitney U for ordinal variables based on a  $p < 0.05$  (95% confidence level).

To assess the association between independent variables and mortality, prevalence ratios (PR) and their respective 95% confidence intervals (95%CI) were calculated using Poisson regressions with robust variance. The Kaplan-Meier test was used to calculate mortality by estimating the probability of survival of patients with COVID-19. The statistical package STATA version 17 (StataCorp, College Station, TX, USA) was used for data processing.

## 2.4. Ethical information

The protocol of the present study was approved by the Research Ethics Committee of the Hospital Nacional Almanzor Aguinaga Asenjo, Lambayeque-Perú. The registration number is CIE-RPL:071-DIC-2021. This protocol complied with the norms contained in the Helsinki Declaration. The data obtained were used only for research purposes, preserving the anonymity of the participants, and eliminating data that could be identified. The database of the present study will be deleted two years after its publication.

## 3. Results

We reviewed the data of 300 patients hospitalized at the Hospital Almanzor Aguinaga of the Red Lambayeque del Seguro Social of Peru who was followed during March and April, August, and September 2020, 3 medical records were excluded for not having the outcome. It was decided to work with 297 patients, being higher than the calculated sample size, to improve the results found.

### 3.1. General characteristics of the population and bivariate analysis

Of the 297 patients studied, 69% were women, the mean age was 63.99 years (SD =  $\pm 15.33$  years). Hypertension was the most frequent comorbidity (36.67%), followed by diabetes mellitus (24.67%) and obesity (8.33%). The median time of illness was 7 days (RIC: 4–11 days), 80.33% presented fever, and 83% had blood group type O (Table 1).

Regarding pulmonary involvement, the mean respiratory rate was 22.5 breaths per minute. The median oxygen saturation on admission was 88% (RIC: 76–93%) in patients without oxygen therapy and 93% (RIC: 89–96%) in patients with oxygen therapy. 65.22% had a ground-glass infiltrate, 74.45% had a bilateral distribution and 51.49% had lung involvement greater than or equal to 50% (Table 1).

A total of 152 (51.18%) died during their hospital stay, representing a rate of 51.18. Statistical significance ( $p < 0.05$ ) was found concerning mortality with epidemiological variables such as age, oxygen saturation on admission with oxygen therapy, respiratory frequency on admission, comorbidities such as hypertension, diabetes mellitus, and symptoms reported on admissions such as cough and dyspnea. Other general characteristics are shown in Table 1.

The diagnosis of Covid-19 was mostly made with the rapid test in 188 patients, PCR-RT in 62, and antigenic test in 1 patient. The remaining patients were probable diagnoses based on clinical and imaging findings. Within the laboratory results at admission, it was found that within the coagulation profile the median fibrinogen level was 929 (RIC: 504.7–1505 md/dl), and the median prothrombin time was 11 (RIC: 10.40–12); likewise, it was found that the median C-reactive protein levels were 2.9 mg/dl (RIC: 0.9–11.01), ferritin was 929.9 ng/ml (RIC: 504.7–1505), D-dimer was 1.77 mcg/ml (RIC: 0.84–4.53). Regarding arterial gas analysis, the mean PH at admission was 7.39 (SD:  $\pm 0.098$ ), median O<sub>2</sub> partial pressure was 68.5 (54.5–89), and CO<sub>2</sub> was 36(31–42).

Among the laboratory results in hospitalization, it was found that within the coagulation profile the median fibrinogen level was 520 (RIC: 430–650 md/dl), and the median prothrombin time was 11 (RIC: 10.20–11.90); also the median C-reactive protein levels were found to be 8.90 mg/dl (RIC: 4.00–20.00), ferritin was 1096 ng/ml (RIC: 604.30–1745), D-dimer was 1.71 mcg/ml (0.86–3.38). The other laboratory test results are listed in Table 2.

In the treatment received, Tocilizumab was only used in one patient, which resulted in mortality. Among the drugs used before hospitalization, we found that ivermectin was used in 23.33% of the patients, azithromycin in 26.67%, and corticoids in 23.33%. In hospitalization we found that ivermectin was used in 25.67% of the patients, azithromycin in 67.33%, standard doses of corticoids were used in 65.33% of the patients, and 53.33% of the patients received therapeutic doses of anticoagulants.

Statistical significance was found concerning outcomes with the use of corticosteroids and anticoagulants before hospitalization. Concerning the drugs used in hospitalization, statistical significance was found in the use of antibiotics, corticoids, and anticoagulants in therapeutic doses. The other results are shown in Table 3.

### 3.2. Characteristics of the treatment received and complications

The most frequent complications reported were: Acute Respiratory Distress Syndrome (ARDS) according to SAFI less than 150 in 151 (50.8%) patients, in those with hospital mortality it reached 121 (80.1%), presenting statistical significance. Mild-moderate ARDS was present in 120 (40.4%) hospitalized patients, 99 (82.5%) without hospital mortality, the result was also statistically significant. Likewise, we found statistical significance with the presence of sepsis, which was present in 152 (51.1%) hospitalized patients (Table 3).

Oxygen therapy times were also evaluated. The average time of binasal cannula use was  $1.86 \pm 3.29$  days with an inverse correlation with time to mortality (spearman  $-0.6003$   $p < 0.000$ ),

Table 1. General characteristics of the study population.

| Variables                     | Total        | Death          |              | p-value <sup>‡</sup> |
|-------------------------------|--------------|----------------|--------------|----------------------|
|                               | n (%)        | Yes            | No           |                      |
| Age (years)                   | 63.99±15.33* | 69.9±14.03*    | 57.4 ±13.9*  | <0.001               |
| Sex                           |              |                |              |                      |
| Female                        | 207 (69)     | 103 (50.49)    | 101 (49.51)  | 0.725                |
| Male                          | 93 (31)      | 49 (52.79)     | 44 (47.31)   |                      |
| Time of illness (days)        | 7 (4–11)**   | 7 (4.5–12)**   | 7 (4–11)**   | 0.580                |
| Intake O2 saturation (%)      |              |                |              |                      |
| Without oxygen therapy        | 88 (76–93)** | 77.5 (70–87)** | 92 (89–95)** | <0.001               |
| With oxygen therapy           | 93 (89–96)** | 92 (85.5–95)** | 95 (92–96)** |                      |
| Respiratory frequency (x min) | 22.5±4.17*   | 24.37±4.15*    | 22.13±3.94*  | <0.001               |
| <b>Comorbidities</b>          |              |                |              |                      |
| Arterial hypertension         | 110 (36.67)  | 77 (70.64)     | 32 (29.36)   | <0.001               |
| Diabetes mellitus             | 74 (24.67)   | 47 (64.40)     | 26 (35.60)   | <0.001               |
| Cardiovascular disease        | 13 (4.33)    | 10 (76.92)     | 3 (23.08)    | 0.086                |
| Obesity                       | 25 (8.33)    | 13 (54.17)     | 11 (45.83)   | 0.760                |
| COPD                          | 9 (3.00)     | 4 (50.00)      | 4 (50.00)    | 0.946                |
| Asthma                        | 12 (4.00)    | 3 (25.00)      | 9 (75.00)    | 0.064                |
| Cancer                        | 14 (4.68)    | 4 (30.77)      | 9 (69.23)    | 0.161                |
| <b>Symptoms</b>               |              |                |              |                      |
| Fever                         | 173 (57.67)  | 92 (53.49)     | 80 (46.51)   | 0.350                |
| Cough                         | 171 (57.00)  | 90 (54.25)     | 79 (46.75)   | 0.029                |
| Dyspnea                       | 241 (80.33)  | 131 (54.58)    | 109 (45.42)  | 0.016                |
| Diarrhea                      | 26 (8.67)    | 8 (30.77)      | 18 (69.23)   | 0.411                |
| <b>Blood Group</b>            |              |                |              |                      |
| Blood group 0                 | 83 (76.85)   | 43 (52.44)     | 39 (47.56)   | 0.964                |
| Blood group A                 | 18 (16.67)   | 10 (58.82)     | 7 (41.18)    |                      |
| Blood group B                 | 6 (5.56)     | 3 (50)         | 3 (50)       |                      |
| Blood group AB                | 1 (0.93)     | 1 (100)        | -            |                      |
| <b>Type of Infiltrator</b>    |              |                |              |                      |
| Tarnished glass               | 105 (65.22)  | 37 (35.6)      | 67 (64.4)    | <b>0.027</b>         |
| Cobblestone                   | 27 (16.77)   | 16 (59.3)      | 11 (40.70)   |                      |
| Consolidation                 | 6 (3.73)     | -              | 6 (100)      |                      |
| Mixed                         | 23 (14.29)   | 8 (34.8)       | 15 (65.22)   |                      |
| <b>Distribution</b>           |              |                |              |                      |
| No Infiltrate                 | 45 (22.73)   | 21 (46.67)     | 24 (53.33)   | 0.479                |
| Unilateral                    | 5 (2.53)     | 1 (20.00)      | 4 (80.00)    |                      |
| Bilateral                     | 148 (74.75)  | 60 (40.82)     | 87 (59.18)   |                      |
| <b>Pulmonary involvement</b>  |              |                |              |                      |
| >50%                          | 69 (51.49)   | 40 (57.97)     | 29 (42.03)   | <0.001               |
| <50%                          | 65 (48.51)   | 11 (17.19)     | 53 (82.81)   |                      |

\* Mean and standard deviation

\*\* Median and interquartile ranges (25–75%)

‡ P-values calculated using the Chi<sup>2</sup> test, Fisher's exact test, T-student, U Mann Whitney, as appropriate.<https://doi.org/10.1371/journal.pone.0285133.t001>

Table 2. Laboratory tests of the studied population.

| Variables                 | Total                    | Death                     |                          | p-value <sup>‡</sup> |
|---------------------------|--------------------------|---------------------------|--------------------------|----------------------|
|                           | n (%)                    | Yes                       | No                       |                      |
| <b>Upon entry</b>         |                          |                           |                          |                      |
| Leukocytes (x1000)        | 9.84 (8.02–14.19) **     | 16.93 (11.41–21.43)**     | 8.46 (7.31–10.43) **     | <0.001               |
| MV/MIV lymphocytes (%)    | 10.05 (4–20.10) **       | 3.55 (2–5) **             | 17.50 (11–24.70) **      | <0.001               |
| Platelets (x 1000)        | 292 (196–387) **         | 260 (175–334)**           | 313 (212–406) **         | 0.057                |
| PCR (mg/dl)               | 2.9 (0.9–11.01) **       | 14.8 (6.70–23) **         | 1.10 (0.30–2.85) **      | <0.001               |
| Ferritin (ng/ml)          | 929.9 (504.7–1505) **    | 1328 (780.1–2000) **      | 678.5 (373.35–1167,5)**  | 0.001                |
| Glucose (mg/dl)           | 108 (86–146) **          | 129 (109–182) **          | 98 (82–117) **           | <0.001               |
| Creatinine (mg/dl)        | 0.69 (0.57–0.96) **      | 0.76 (0.56–1.72) **       | 0.67 (0.57–0.81) **      | 0.171                |
| Urea (mg/dl)              | 36 (23.20–60.10) **      | 59 (36.7–110) **          | 25.9 (21–40.40) **       | <0.001               |
| LDH (IU/l)                | 289.90 (212.20–407.50)** | 458.80 (355.20–606.40) ** | 222 (189–258.50) **      | <0.001               |
| D-dimer (mcg/ml)          | 1.77 (0.84–4.53) **      | 4.72 (2.13–5.00) **       | 1.06(0.54–2.72) **       | <0.001               |
| Prothrombin time          | 11 (10.40–12) **         | 11.72 (10.70–12.40) **    | 10.70 (10.10–11.50) **   | 0.002                |
| Fibrinogen                | 451 (338.80–595.80)**    | 523.50 (341.25–645.95)**  | 426.85 (338.80–513.50)** | 0.017                |
| Ph at the entrance        | 7.39(±0.098) *           | 7.37 (±0.105) *           | 7.43 (7,39–7.46) *       | 0.012                |
| PO2                       | 68.5 (54.5–89) **        | 62 (50–75) **             | 92 (68.5–123.5) **       | <0.001               |
| PCO2                      | 36 (31–42) **            | 35 (31–44) **             | 37.5 (34–41) **          | 0.422                |
| <b>In Hospitalization</b> |                          |                           |                          |                      |
| Leukocytes (x 1000)       | 10.86 (7.6–15.11) **     | 12.95 (9.77–16.73) **     | 9.22 (6.81–12.01) **     | <0.001               |
| Lymphocytes (%)           | 8 (4–13.7) **            | 5 (3–8) **                | 12.9 (7–19) **           | <0.001               |
| Platelets (x 1000)        | 261 (196–342) **         | 249 (163–303) **          | 286 (216–359) **         | 0.001                |
| PCR (mg/dl)               | 8,90 (4–22,20)**         | 16.3 (6.7–27.7)**         | 5.2 (1.7–8.9)**          | <0.001               |
| Ferritin (ng/ml)          | 1096 (604.3–1745)**      | 1295 (803.8–2000)**       | 819 (498.2–1498)**       | <0.001               |
| Glucose (mg/dl)           | 116 (95–158)**           | 127 (101–165)**           | 111 (90–149)**           | <0.001               |
| Creatinine (mg/dl)        | 0.77 (0.63–1.12)**       | 0.86 (0.67–1.39)**        | 0.7 (0.58–0.88)**        | 0.001                |
| Urea (mg/dl)              | 43 (28.6–65.5)**         | 52.6 (38.6–79)**          | 35 (24.3–49)**           | <0.001               |
| LDH (IU/l)                | 328.75 (256.2–467.9)**   | 441.7 (327.7–584.7)**     | 267.9 (217–333.8)**      | <0.001               |
| D-dimer (mcg/ml)          | 1.71 (0.86–3.38)**       | 2.32 (1.35–4.49)**        | 1.36 (0.56–2.47)**       | 0.001                |
| Prothrombin time          | 11 (10.2–11.9)**         | 11.5 (10.55–12)**         | 10.9 (10–11.6)**         | 0.007                |
| Fibrinogen                | 520 (430–650)**          | 520.5 (430–640)**         | 519.9 (428.9–650)**      | 0.936                |

\* Mean and standard deviation

\*\* Median and interquartile ranges (25–75%)

‡ P-values calculated using the T-student, U Mann Whitney, as appropriate.

<https://doi.org/10.1371/journal.pone.0285133.t002>

and the average time of reservoir mask use was  $3.44 \pm 4.26$  days with a positive correlation with time to mortality (spearman 0.419  $p < 0.000$ ). There was no correlation between the time of use of noninvasive ventilation and time to death ( $p = 0.31$ ).

The average time of use of invasive mechanical ventilation was  $0.30 \pm 1.51$  days with a maximum value of 14 days, and a positive correlation was found with the time to death (spearman 0.228  $p = 0.0001$ ) (Fig 1).

Of the 297 hospitalized patients studied, 152 had mortality as the outcome and 145 were discharged or transferred to another service. Twenty-six patients were admitted to the Intensive Care Unit (ICU). The mean time to death was  $2.66 \pm 4.2$  days with a minimum of 0 and a maximum of 26 days and the average length of stay in the ICU was  $0.49 \pm 1.86$  days with a minimum of 0 and a maximum of 14 days.



Table 3. COVID-19 treatment used in the study population.

| Variables                       | Total       | Death       |             | p-value <sup>‡</sup> |
|---------------------------------|-------------|-------------|-------------|----------------------|
|                                 | n (%)       | Yes         | No          |                      |
| <b>Prior to hospitalization</b> |             |             |             |                      |
| Ivermectin                      | 67 (22.33)  | 37 (56.06)  | 29 (43.94)  | 0.368                |
| Azithromycin                    | 80 (26.67)  | 41 (51.25)  | 39 (48.75)  | 0.988                |
| Hydroxychloroquine              | 5 (1.67)    | 3 (60.00)   | 2 (40.00)   | 0.691                |
| Corticosteroid                  | 70 (23.33)  | 43 (62.32)  | 26 (37.68)  | 0.035                |
| Antibiotics                     | 79 (26.33)  | 46 (58.97)  | 32 (41.03)  | 0.109                |
| Anticoagulants                  | 50 (16.67)  | 32 (65.31)  | 17 (34.69)  | 0.030                |
| <b>In hospitalization</b>       |             |             |             |                      |
| Ivermectin                      | 77 (25.67)  | 44 (57.89)  | 32 (42.11)  | 0.174                |
| Hydroxychloroquine              | 70 (23.33)  | 33 (47.14)  | 37 (52.86)  | 0.440                |
| Azithromycin                    | 202 (67.33) | 107 (52.97) | 95 (47.03)  | 0.368                |
| Lopinavir/ritonavir             | 53 (17.67)  | 24 (45.28)  | 29 (54.72)  | 0.343                |
| Antibiotics                     | 278(92.67)  | 147 (52.88) | 131 (47.12) | 0.025                |
| Corticosteroids                 |             |             |             |                      |
| Standard dosage                 | 196 (65.33) | 110(56.7)   | 84 (43.3)   | 0.002                |
| Pulse dose                      | 42 (14.00)  | 23 (54.8)   | 19 (45.24)  |                      |
| I do not use                    | 62(20.67)   | 19 (31.2)   | 42 (68.9)   |                      |
| <b>Anticoagulants</b>           |             |             |             |                      |
| Prophylactic Dose               | 130 (43.33) | 82 (51.9)   | 76 (48.1)   | 0.791                |
| Therapeutic Dose                | 160 (53.33) | 82 (63.6)   | 47 (36.4)   | <0.001               |

<sup>‡</sup> P-values calculated using the Chi<sup>2</sup> test, Fisher's exact test, as appropriate.

<https://doi.org/10.1371/journal.pone.0285133.t003>

The average time to discharge was 4.1±6.55 days and the average hospital stay was 6.66± 6.2 days with a minimum of 1 and a maximum of 48 days.

### 3.3. Survival analysis

The probability of survival at 3 days of hospitalization was 54.4%, at 7 days 23.5%, and 0% at day 26. In patients who were admitted to the ICU, the probability of survival on day 2 was 82.4% compared with those who were not admitted to the ICU, which was 65.9%; on day 7 it was 35.3% vs. 21.9%. This has minimal statistical significance (log-rank p = 0.053) (Fig 2).

In patients with Severe Respiratory Distress Syndrome determined by SAFI<150, the probability of survival on day 2 was 67.7% compared to those not admitted to ICU which was 67.8%, on day 7 was 22.3% vs 28.6%. These results are not statistically significant (log-rank p = 0.395) (Fig 3).

The probability of survival at 3 days of ICU stay was 65.3%, at 7 days 24.2%, and 0% on day 14. In patients with sepsis, the probability of survival on day 2 was 71.4% compared to those who were not admitted to the ICU, which was 62.5%; on day 6 it was 35.7% vs. 12.5%. This result is not statistically significant (log-rank p = 0.22), nor was statistical significance found with other complications such as ARDS with SAFI<150 (log-rank p = 0.19) (Fig 4).

### 3.4. Multivariate analysis

Poisson regression models have been created with bivariate associated variables, obtaining three initial models with epidemiological characteristics (hypertension, diabetes, cough, previous use of corticoids, previous use of anticoagulation, and respiratory frequency on

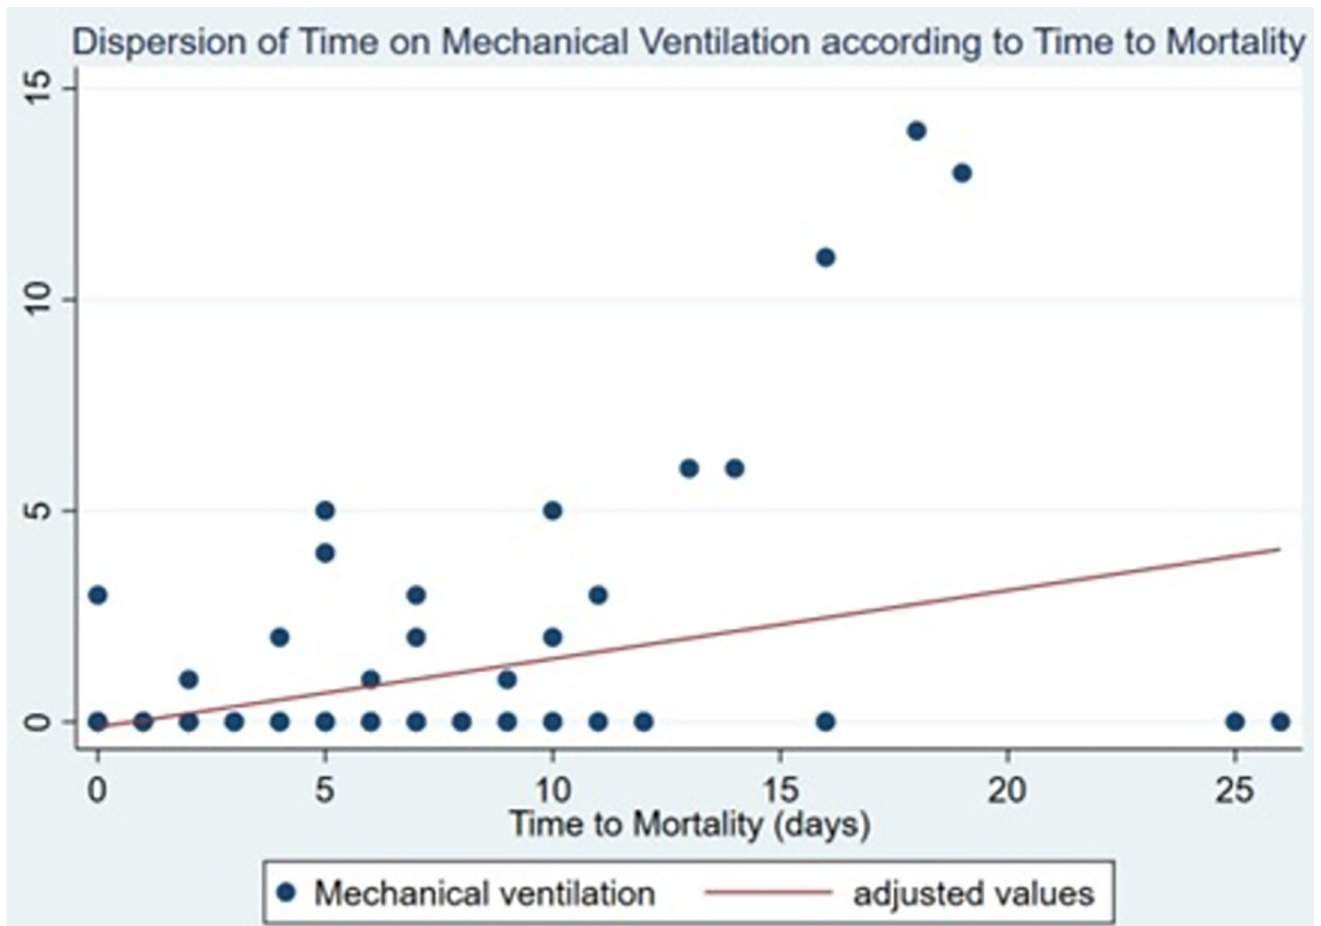

**Fig 1. Time on mechanical ventilation according to time to mortality.**

<https://doi.org/10.1371/journal.pone.0285133.g001>

admission), clinical and laboratory characteristics (lymphocytes, CRP, DD, type of infiltrating, percentage of involvement), in addition to the therapeutic, complications and hospital times (corticotherapy, therapeutic anticoagulation, ICU admission criteria, ARDS due to SAFI, sepsis and time in ICU). Variables were eliminated from the models due to their high degree of collinearity and the models were designed. Subsequently, a single model was created with the verified variables. The numerical variables analyzed, and their respective categories were not taken into account.

Poisson regression showed that the probability of death in adult patients hospitalized for COVID-19 increased with comorbidities such as hypertension (PR:1.45; 95%CI: 1.01–2.09), with imaging findings of crazy paving (PR:1.51; 95%CI 1.1–2.09) and in patients with complications such as sepsis (PR:9.47; 95%CI: 3.72–24.07) (Table 4).

#### 4. Discussion

The COVID-19 pandemic remains a public health emergency of global significance that threatens human health and welfare [19]. Therefore, in this retrospective cohort study, clinical and laboratory data from 300 confirmed cases of COVID-19 admitted to the Hospital Nacional Almanzor Aguinaga Asenjo (HNAAA) in Peru were analyzed.

Mortality in the study was 51.18 per 100 persons. In Peru, Valenzuela K et al. reported a mortality rate of 71.83 per 100 persons [20]. However, it differs from that reported in France



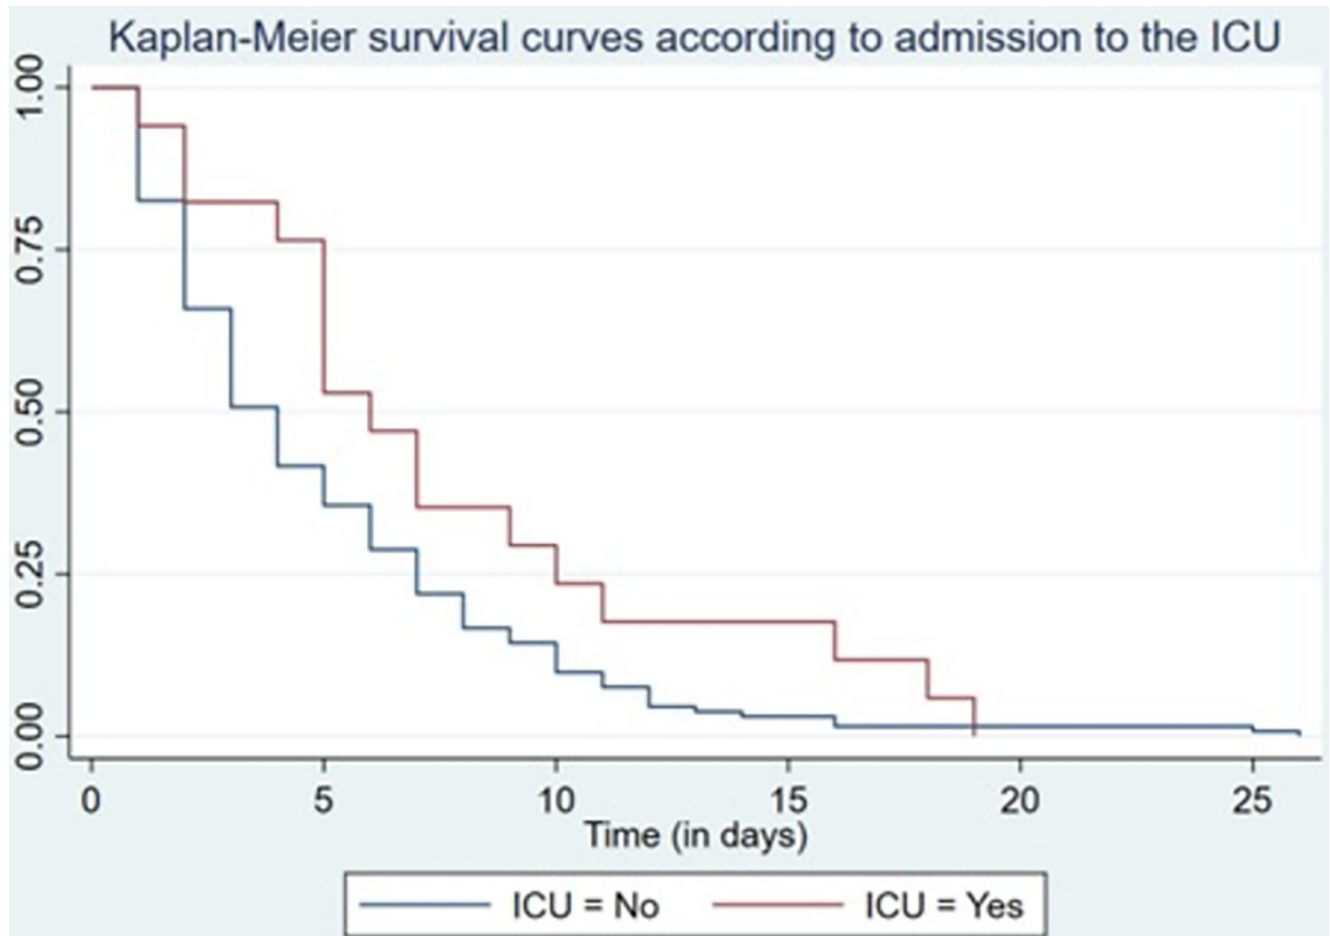

**Fig 2. Kaplan-Meier survival according to admission to the ICU.**

<https://doi.org/10.1371/journal.pone.0285133.g002>

by Martinot M, et al, who reported lower mortality, reaching 19.1% [21]. This could be explained by demographic and clinical differences, comorbidities (hypertension), and specific treatments that were discovered based on evidence throughout the pandemic, as well as clear differences in the health systems in place before the health emergency [22, 23].

The present study demonstrated according to the regression model that the probability of mortality was higher in persons with a history of arterial hypertension, in those who had imaging findings such as consolidation or crazy paving, and who had complications such as sepsis. These models are comparable with other studies such as that of Filardo T et al. In New York, where mortality was associated with dementia (RR 2.11 95%CI 1.50–2.96), age 65 years or older (RR 1.97, 95%CI 1.31–2.95), obesity (RR 1.37, 95%CI 1.07–1.74) and male sex [24], Mendes A et al, in an older adult population in Switzerland with a model composed of the male sex (HR 4.00, 95% CI 2.08–7.71), crepitant (HR 2.42, 95% CI 1.15–6.06), and increased FiO<sub>2</sub> use (HR 1.06, 95% CI 1.03–1.09) [25], Kamis F et al in Oman in their study COVID-19 mortality was associated with advanced age, heart disease (aOR: 1.84; 95% CI: 1.11–3.03), liver disease, elevated ferritin, ARDS, sepsis (aOR: 1.77; 95% CI: 1.12–2.80), and ICU admission (aOR: 2.22; 95% CI: 1.12–4.38) [26], or that of Huan J et al in China where associated factors such as C-reactive protein (HR, 2.063; 95% CI, 1.036–4.109), neutrophil count (HR, 2.015; 95% CI, 1.154–3.518), and interleukin 6 were found [27].

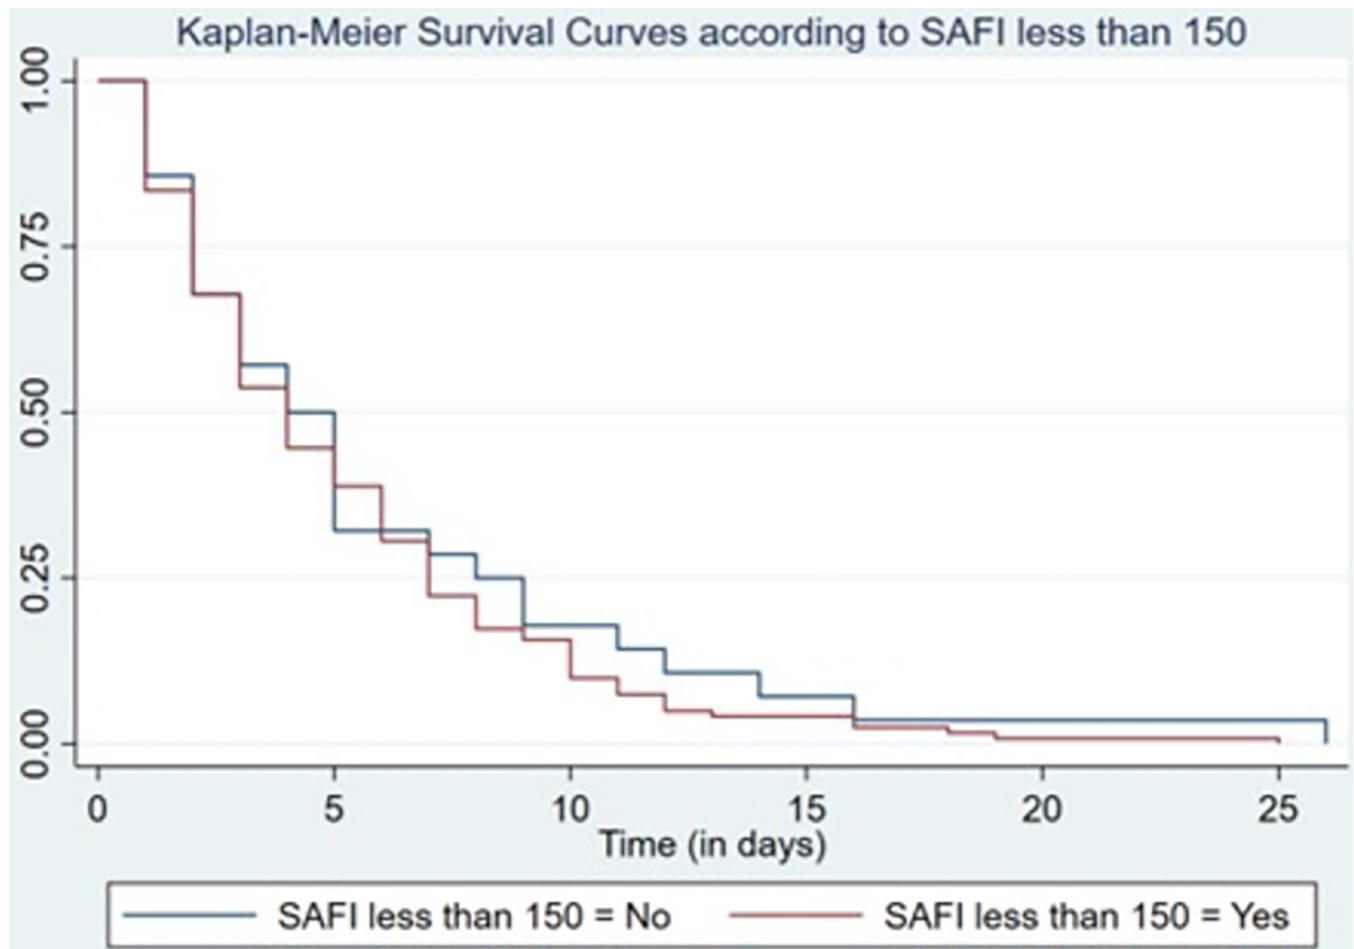

**Fig 3. Kaplan-Meier Survival according to SAFI less than 150.**

<https://doi.org/10.1371/journal.pone.0285133.g003>

Hypertension is the leading cause of cardiovascular disease and death worldwide, increasing the risk of in-hospital deaths, ICU admissions, and the need for invasive ventilation in patients with COVID-19 [27, 28]. The results presented in our study show similar results, the mortality of patients with COVID-19 was higher in hypertensive individuals. However, the strength of association is lower than reported in other studies. Mubarik S, et al in China, presented similar results, where patients with hypertension had twice the risk of COVID-19 mortality, in addition, the median survival time of 3 to 5 days was shorter than in patients without hypertension [28].

Although there is no clear evidence regarding the association between hypertension and COVID-19 mortality, many mechanisms could explain this association. Patients with underlying cardiovascular disease are more likely to decline to an unstable hemodynamic state [29]. The inflammatory reaction caused by SARS-CoV-2 infection could lead to a hypercoagulant state and ruptures of atherosclerotic plaques, culminating in thrombotic events [30]. The priority of treatments administered in the ICU is focused on reducing the inflammatory response produced by SARS-CoV-2 and nosocomial infections, neglecting other conditions, which could lead to unfavorable clinical outcomes for patients with cardiovascular diseases [31].

The study showed that sepsis was a predictor of mortality. The study by Benes J. et al. in 2022 reported that sepsis and respiratory failure accounted for about 75% of deaths in patients

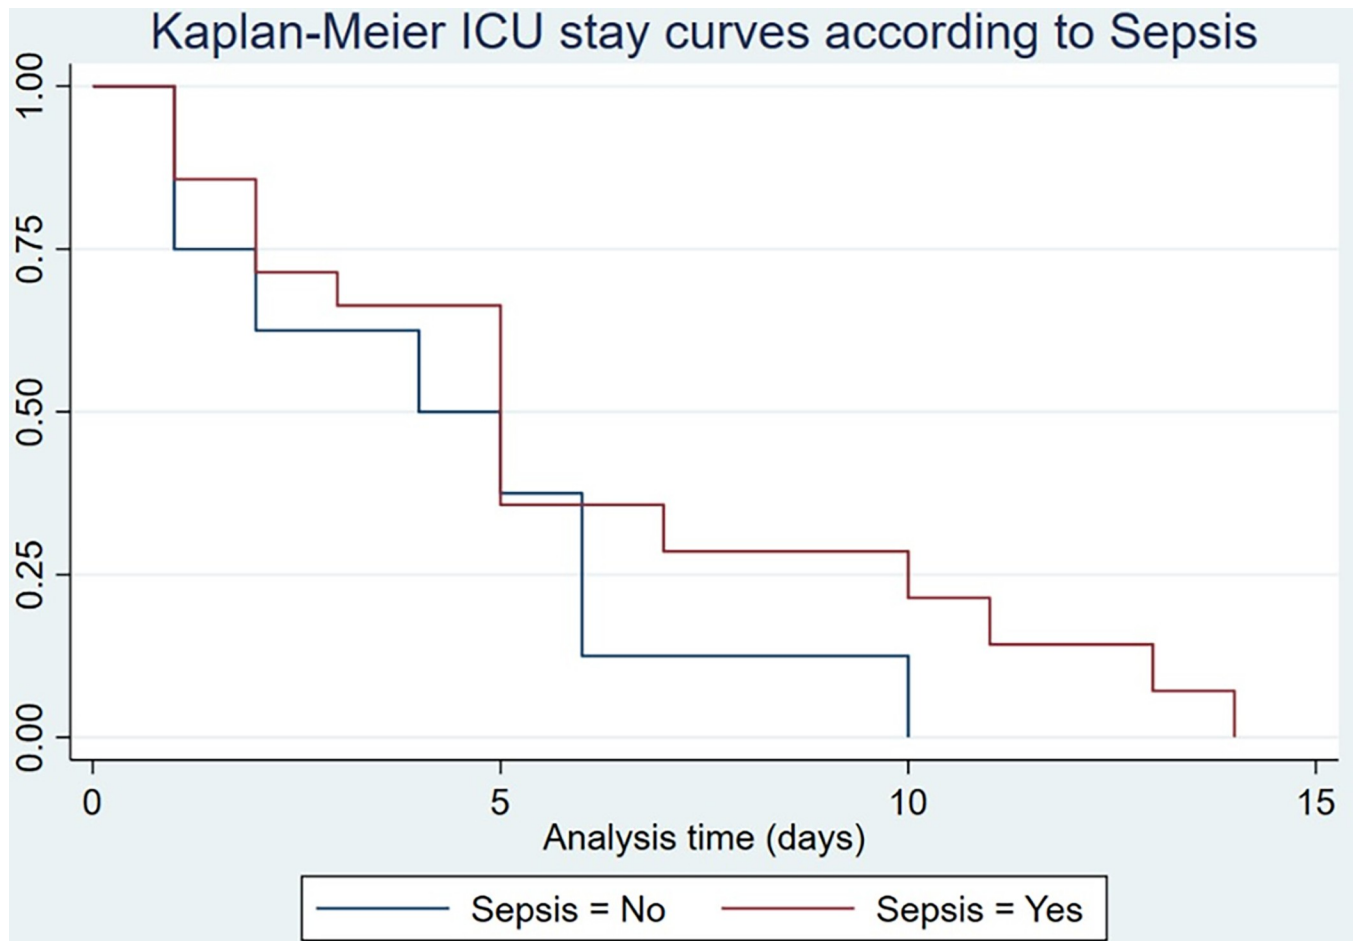

Fig 4. ICU stay by Kaplan-Meier by Sepsis.

<https://doi.org/10.1371/journal.pone.0285133.g004>

with COVID-19; as a consequence, they increased ICU stays, necessitated the administration of vasopressor and inotropic drugs, and led to renal impairment [32, 33]. This could be explained by the fact that sepsis results in life-threatening organ dysfunction caused by a dysregulated host response to COVID-19 infection [34]. To identify septic patients at risk of in-hospital mortality, factors such as the need for invasive ventilation and renal replacement therapy, the presence of septic shock, and procalcitonin levels greater than 2 ng/ml should be considered [35, 36].

On the other hand, findings of specific infiltrates such as crazy paving were found to be associated with increased mortality. Currently, it has been found that radiographic infiltrate findings, especially bilateral ones, together with other factors such as age, comorbidities (hypertension, chronic respiratory disease, asthma, chronic heart disease, and chronic kidney disease), and biomarkers are associated with worse outcomes, including mortality and a prolonged hospital stay [37]. The imaging evolution of severe disease suggests that these findings would be very frequent in the bilateral distribution of lung disease.

It has been previously described that with advancing age, mortality for COVID-19 is increasing [5]. Our study was no exception, with a mean age of 63.99 in deceased patients. This coincides with previous studies carried out at the national level [18, 38] and internationally [24, 26].

**Table 4. Factors associated with mortality in patients hospitalized for COVID-19.**

| Variable                     | PR   | P-value | 95% CI     |
|------------------------------|------|---------|------------|
| <b>Arterial hypertension</b> |      |         |            |
| No                           | Ref. |         |            |
| Si                           | 1.45 | 0,046   | 1.01–2.09  |
| <b>Age</b>                   |      |         |            |
| 18–59                        | Ref. |         |            |
| >60                          | 1.46 | 0.082   | 0.95–2.25  |
| <b>Respiratory frequency</b> |      |         |            |
| <30                          | Ref. |         |            |
| >30                          | 0.97 | 0.929   | 0.62–1.54  |
| <b>Type of infiltrate</b>    |      |         |            |
| Ground glass                 | Ref. |         |            |
| Cobblestone                  | 1.52 | 0.011   | 1.1–2.09   |
| Consolidation                | 1.22 | <0.0001 | 2.70–5.53  |
| <b>Sepsis</b>                |      |         |            |
| No                           | Ref. |         |            |
| Yes                          | 9.47 | <0,0001 | 3.72–24.07 |

PR: potential ratio; CI: Confidence interval

<https://doi.org/10.1371/journal.pone.0285133.t004>

This could be based on the fact that a high number of older adults develop a state of vulnerability due to mild chronic inflammation, which leads to frailty and adverse outcomes such as mortality [39]. This coupled with the accumulation of senescent cells, which secrete pro-inflammatory mediators [40], would further increase inflammation in COVID-19-infected patients, thereby increasing mortality, as hypothesized by Akbar AN. et al. [41].

Some laboratorial characteristics were found to be associated with COVID-19 mortality, among which D-dimer, LDH, and PCR were mainly associated. Similar results were reported by other studies conducted in China [42] and the United States [43]. In the Peruvian population, an association was found with CRP, LDH > 350 UI/L, ferritin > 750 ng/mL, and leukocyte. In addition to D-dimer (> = 1 µg/mL), severe lymphopenia, both in crude and adjusted analyses [44, 45].

LDH is an enzyme found inside cells in almost all organ systems [43], increased levels may predict severity and mortality from COVID-19 [46]. Similarly, increased D-dimer, a product of fibrin degradation and an indicator of coagulopathy, has been associated with an increased risk of mortality in patients with COVID-19 [16, 47]. PCR is an inflammatory marker and is elevated in patients with severe COVID-19 disease [48–50].

Our study reported that there is an association between the administration of anticoagulants therapeutically and increased deaths in COVID-19-infected patients. This is consistent with a recent meta-analysis, which reports that administration of anticoagulants in persons with COVID-19 was not associated with a lower risk of all-cause mortality and ICU admission compared with those who were not given anticoagulants [51].

The range of incidence of thrombosis among hospitalized patients with COVID-19 is wide, between 7.7–16.0% in hospitalized patients and 6.7–29.4% of those admitted to the ICU [52–54]. Early in the COVID-19 pandemic, international guidelines recommended the administration of prophylactic low-molecular-weight heparin (LMWH) to all hospitalized patients with COVID-19 to reduce mortality [55].

Despite the adequate use of antithrombotic prophylaxis, recent studies have shown that patients with COVID-19 have a higher incidence of venous thromboembolism (VTE) than

those with other infectious diseases [56–58]. Reporting that in the first 24 hours after hospital admission, the incidence of VTE in patients with COVID-19 reaches 50% [53].

Excess COVID-19 lethality may be related to hypercoagulability and microthrombi, leading to occlusion of pulmonary capillaries [59, 60], so that anticoagulation therapy initiated at advanced stages of COVID-19 may be insufficient [61].

This could be explained by the fact that the hypercoagulability of COVID-19 is a product of vascular inflammation [62], Therefore, the application of anticoagulants does not influence the progression of COVID-19, nor the mortality of infected patients [63]. Based on this, the best treatment option is to focus on thrombogenic inflammation or vasculopathy and not on secondary hypercoagulability [64].

The results should be interpreted with caution. The characteristics of the selection of participants do not allow us to extrapolate the data to the study population; however, addressing this issue gives us an impression of the reality of hospital mortality due to COVID-19 during the first wave of the pandemic in Peru, the Lambayeque region being one of the first regions to face the first wave of COVID-19. Other factors not considered in the study that could influence mortality (genetic factors, environmental factors, interactions between therapeutic options, unmeasured variables, spurious associations) should be taken into consideration. The data were obtained from digital medical records, so we may have errors in the measurement and missing data on variables. In addition, we do not have the necessary information to calculate risk functions such as the Hazard Ratio. Prospective studies covering other variables not considered are recommended, in addition to assessing the applicability of the model in different phases of the pandemic to recognize patients at high risk of mortality and improve their access to critical care units.

## 5. Conclusions

In this cohort, mortality in hospitalized patients with COVID-19 was 51.18 per 100 persons and was associated with a history of hypertension, type of infiltrating, and sepsis.

## Acknowledgments

Thanks are due to Alejandro Juárez-Ubillus and Pierina Perez-Espinoza for their contributions to the initial versions of the study.

## Author Contributions

**Conceptualization:** Edwin Aguirre-Milachay, Darwin A. León-Figueroa, Marisella Chumán-Sánchez.

**Data curation:** Edwin Aguirre-Milachay.

**Formal analysis:** Edwin Aguirre-Milachay, Luccio Romani.

**Investigation:** Edwin Aguirre-Milachay.

**Methodology:** Edwin Aguirre-Milachay.

**Resources:** Darwin A. León-Figueroa, Marisella Chumán-Sánchez.

**Software:** Darwin A. León-Figueroa, Luccio Romani.

**Supervision:** Fernando M. Runzer-Colmenares.

**Validation:** Fernando M. Runzer-Colmenares.

**Writing – original draft:** Darwin A. León-Figueroa, Marisella Chumán-Sánchez, Luccio Romani.

**Writing – review & editing:** Edwin Aguirre-Milachay, Darwin A. León-Figueroa, Marisella Chumán-Sánchez.

## References

1. Rodriguez-Morales AJ, León-Figueroa DA, Romani L, McHugh TD, Leblebicioglu H. Vaccination of children against COVID-19: the experience in Latin America. *Ann Clin Microbiol Antimicrob* 2022; 21:1–5. <https://doi.org/10.1186/S12941-022-00505-7/FIGURES/1>.
2. WHO Coronavirus (COVID-19) Dashboard | WHO Coronavirus (COVID-19) Dashboard With Vaccination Data n.d. <https://covid19.who.int/> (accessed June 7, 2022).
3. Covid 19 en el Perú—Ministerio del Salud n.d. [https://covid19.minsa.gob.pe/sala\\_situacional.asp](https://covid19.minsa.gob.pe/sala_situacional.asp) (accessed June 7, 2022).
4. Soto A, Quiñones-Laveriano DM, Azañero J, Chumpitaz R, Claros J, Salazar L, et al. Mortality and associated risk factors in patients hospitalized due to COVID-19 in a Peruvian reference hospital. *PLoS One* 2022;17. <https://doi.org/10.1371/JOURNAL.PONE.0264789>.
5. Mikami T, Miyashita H, Yamada T, Harrington M, Steinberg D, Dunn A, et al. Risk Factors for Mortality in Patients with COVID-19 in New York City. *J Gen Intern Med* 2021; 36:17–26. <https://doi.org/10.1007/s11606-020-05983-z> PMID: 32607928
6. Tian W, Jiang W, Yao J, Nicholson CJ, Li RH, Sigurslid HH, et al. Predictors of mortality in hospitalized COVID-19 patients: A systematic review and meta-analysis. *J Med Virol* 2020; 92:1875–83. <https://doi.org/10.1002/jmv.26050> PMID: 32441789
7. Grasselli G, Greco M, Zanella A, Albano G, Antonelli M, Bellani G, et al. Risk Factors Associated With Mortality Among Patients With COVID-19 in Intensive Care Units in Lombardy, Italy. *JAMA Intern Med* 2020; 180:1345–55. <https://doi.org/10.1001/jamainternmed.2020.3539> PMID: 32667669
8. Grasselli G, Zangrillo A, Zanella A, Antonelli M, Cabrini L, Castelli A, et al. Baseline Characteristics and Outcomes of 1591 Patients Infected With SARS-CoV-2 Admitted to ICUs of the Lombardy Region, Italy. *JAMA* 2020; 323:1574–81. <https://doi.org/10.1001/jama.2020.5394> PMID: 32250385
9. Huang C, Wang Y, Li X, Ren L, Zhao J, Hu Y, et al. Clinical features of patients infected with 2019 novel coronavirus in Wuhan, China. *The Lancet* 2020; 395:497–506. [https://doi.org/10.1016/S0140-6736\(20\)30183-5/ATTACHMENT/D5332CA1-83D8-4C4C-BC57-00A390BF0396/MMC1.PDF](https://doi.org/10.1016/S0140-6736(20)30183-5/ATTACHMENT/D5332CA1-83D8-4C4C-BC57-00A390BF0396/MMC1.PDF).
10. Guan W, Ni Z, Hu Y, Liang W, Ou C, He J, et al. Clinical Characteristics of Coronavirus Disease 2019 in China. *New England Journal of Medicine* 2020; 382:1708–20. <https://doi.org/10.1056/NEJMoa2002032> PMID: 32109013
11. Arentz M, Yim E, Klaff L, Lokhandwala S, Riedo FX, Chong M, et al. Characteristics and Outcomes of 21 Critically Ill Patients With COVID-19 in Washington State. *JAMA* 2020; 323:1612–4. <https://doi.org/10.1001/jama.2020.4326> PMID: 32191259
12. Bhatraju PK, Ghassemieh BJ, Nichols M, Kim R, Jerome KR, Nalla AK, et al. Covid-19 in Critically Ill Patients in the Seattle Region—Case Series. *New England Journal of Medicine* 2020; 382:2012–22. <https://doi.org/10.1056/NEJMoa2004500> PMID: 32227758
13. Wang D, Hu B, Hu C, Zhu F, Liu X, Zhang J, et al. Clinical Characteristics of 138 Hospitalized Patients With 2019 Novel Coronavirus–Infected Pneumonia in Wuhan, China. *JAMA* 2020; 323:1061–9. <https://doi.org/10.1001/jama.2020.1585> PMID: 32031570
14. Grasselli G, Pesenti A, Cecconi M. Critical Care Utilization for the COVID-19 Outbreak in Lombardy, Italy: Early Experience and Forecast During an Emergency Response. *JAMA* 2020; 323:1545–6. <https://doi.org/10.1001/jama.2020.4031> PMID: 32167538
15. Yang X, Yu Y, Xu J, Shu H, Xia J, Liu H, et al. Clinical course and outcomes of critically ill patients with SARS-CoV-2 pneumonia in Wuhan, China: a single-centered, retrospective, observational study. *Lancet Respir Med* 2020; 8:475–81. [https://doi.org/10.1016/S2213-2600\(20\)30079-5](https://doi.org/10.1016/S2213-2600(20)30079-5) PMID: 32105632
16. Zhou F, Yu T, Du R, Fan G, Liu Y, Liu Z, et al. Clinical course and risk factors for mortality of adult inpatients with COVID-19 in Wuhan, China: a retrospective cohort study. *The Lancet* 2020; 395:1054–62. [https://doi.org/10.1016/S0140-6736\(20\)30566-3/ATTACHMENT/E61DC4CE-2C32-4FA9-85D7-95911E7D3B94/MMC1.PDF](https://doi.org/10.1016/S0140-6736(20)30566-3/ATTACHMENT/E61DC4CE-2C32-4FA9-85D7-95911E7D3B94/MMC1.PDF). PMID: 32171076
17. Richardson S, Hirsch JS, Narasimhan M, Crawford JM, McGinn T, Davidson KW, et al. Presenting Characteristics, Comorbidities, and Outcomes Among 5700 Patients Hospitalized With COVID-19 in the New York City Area. *JAMA* 2020; 323:2052–9. <https://doi.org/10.1001/jama.2020.6775> PMID: 32320003



18. Hueda-Zavaleta M, Copaja-Corzo C, Bardales-Silva F, Flores-Palacios R, Barreto-Rocchetti L, Benites-Zapata VA. Factors associated with mortality due to COVID-19 in patients from a public hospital in Tacna, Peru. *Rev Peru Med Exp Salud Publica* 2021; 38:214–23. <https://doi.org/10.17843/RPMESP.2021.382.7158>.
19. Aljohani FD, Khattab A, Elbadawy HM, Alhaddad A, Alahmadey Z, Alahmadi Y, et al. Prognostic factors for predicting severity and mortality in hospitalized COVID-19 patients. *J Clin Lab Anal* 2022; 36:e24216. <https://doi.org/10.1002/jcla.24216> PMID: 35076953
20. Casquino KV, Espinoza Venero A, Carlos J, Galvez Q. Mortalidad y factores pronósticos en pacientes hospitalizados por COVID-19 en la Unidad de Cuidados Intermedios de un hospital público de Lima, Perú. *Horizonte Médico (Lima)* 2021; 21:e1370–e1370. <https://doi.org/10.24265/HORIZMED.2021.V21N1.05>.
21. Martinot M, Eyriey M, Gravier S, Bonijoly T, Kayser D, Ion C, et al. Predictors of mortality, ICU hospitalization, and extrapulmonary complications in COVID-19 patients. *Infect Dis Now* 2021; 51:518–25. <https://doi.org/10.1016/j.idnow.2021.07.002> PMID: 34242842
22. Shah C, Grando DJ, Rainess RA, Ayad L, Gobran E, Benson P, et al. Factors associated with increased mortality in hospitalized COVID-19 patients. *Annals of Medicine and Surgery* 2020; 60:308–13. <https://doi.org/10.1016/j.amsu.2020.10.071> PMID: 33169090
23. Alizadehsani R, Eskandarian R, Behjati M, Zahmatkesh M, Roshanzamir M, Izadi NH, et al. Factors associated with mortality in hospitalized cardiovascular disease patients infected with COVID-19. *Immun Inflamm Dis* 2022; 10:e561. <https://doi.org/10.1002/iid3.561> PMID: 35048534
24. Filardo TD, Khan MR, Krawczyk N, Galitzer H, Karmen-Tuohy S, Coffee M, et al. Comorbidity and clinical factors associated with COVID-19 critical illness and mortality at a large public hospital in New York City in the early phase of the pandemic (March-April 2020). *PLoS One* 2020;15. <https://doi.org/10.1371/JOURNAL.PONE.0242760>.
25. Mendes A, Serratrice C, Herrmann FR, Genton L, Périvier S, Scheffler M, et al. Predictors of In-Hospital Mortality in Older Patients With COVID-19: The COVIDAge Study. *J Am Med Dir Assoc* 2020; 21:1546–1554.e3. <https://doi.org/10.1016/j.jamda.2020.09.014> PMID: 33138936
26. Khamis F, Memish Z, Bahrani M al, Dowaiqi S al, Pandak N, Bolushi Z al, et al. Prevalence and predictors of in-hospital mortality of patients hospitalized with COVID-19 infection. *J Infect Public Health* 2021; 14:759–65. <https://doi.org/10.1016/j.jiph.2021.03.016> PMID: 34022734
27. Wang JH, Chen RD, Yang HK, Zeng LC, Chen H, Hou YY, et al. Inflammation-associated factors for predicting in-hospital mortality in patients with COVID-19. *J Med Virol* 2021; 93:2908–17. <https://doi.org/10.1002/jmv.26771> PMID: 33393678
28. Mubarak S, Liu X, Eshak ES, Liu K, Liu Q, Wang F, et al. The Association of Hypertension With the Severity of and Mortality From the COVID-19 in the Early Stage of the Epidemic in Wuhan, China: A Multicenter Retrospective Cohort Study. *Front Med (Lausanne)* 2021;8. <https://doi.org/10.3389/FMED.2021.623608>.
29. Yang C, Jin Z. An Acute Respiratory Infection Runs Into the Most Common Noncommunicable Epidemic—COVID-19 and Cardiovascular Diseases. *JAMA Cardiol* 2020; 5:743–4. <https://doi.org/10.1001/jamacardio.2020.0934> PMID: 32211809
30. Zeng J, Huang J, Pan L. How to balance acute myocardial infarction and COVID-19: the protocols from Sichuan Provincial People's Hospital. *Intensive Care Med* 2020; 46:1111–3. <https://doi.org/10.1007/s00134-020-05993-9> PMID: 32162032
31. Han Y, Zeng H, Jiang H, Yang Y, Yuan Z, Cheng X, et al. CSC Expert Consensus on Principles of Clinical Management of Patients with Severe Emergent Cardiovascular Diseases during the COVID-19 Epidemic. *Circulation* 2020; 141:E810–6. <https://doi.org/10.1161/CIRCULATIONAHA.120.047011> PMID: 32216640
32. Benes J, Jankowski M, Szuldrzynski K, Zahorec R, Lainscak M, Ruszkai Z, et al. SepsEast Registry indicates high mortality associated with COVID-19 caused acute respiratory failure in Central-Eastern European intensive care units. *Sci Rep* 2022;12. <https://doi.org/10.1038/S41598-022-18991-2>.
33. Contou D, Cally R, Sarfati F, Desaint P, Fraissé M, Plantefève G. Causes and timing of death in critically ill COVID-19 patients. *Crit Care* 2021;25. <https://doi.org/10.1186/S13054-021-03492-X>.
34. Singer M, Deutschman CS, Seymour C, Shankar-Hari M, Annane D, Bauer M, et al. The Third International Consensus Definitions for Sepsis and Septic Shock (Sepsis-3). *JAMA* 2016; 315:801–10. <https://doi.org/10.1001/jama.2016.0287> PMID: 26903338
35. Heubner L, Hattenhauer S, Güldner A, Petrick PL, Rößler M, Schmitt J, et al. Characteristics and outcomes of sepsis patients with and without COVID-19. *J Infect Public Health* 2022; 15:670–6. <https://doi.org/10.1016/j.jiph.2022.05.008> PMID: 35617831
36. Romaní L, León-Figueroa DA, Rafael-Navarro D, Barboza JJ, Rodríguez-Morales AJ. Association between the Use of Antibiotics and the Development of Acute Renal Injury in Patients Hospitalized for

- COVID-19 in a Hospital in the Peruvian Amazon. *Journal of Clinical Medicine* 2022, Vol 11, Page 4493 2022; 11:4493. <https://doi.org/10.3390/jcm11154493> PMID: 35956109
37. Ozonoff A, Schaenman J, Jayavelu ND, Milliren CE, Calfee CS, Cairns CB, et al. Phenotypes of disease severity in a cohort of hospitalized COVID-19 patients: Results from the IMPACC study. *EBioMedicine* 2022;83. <https://doi.org/10.1016/j.ebiom.2022.104208>.
  38. Mejía F, Medina C, Cornejo E, Morello E, Vásquez S, Alave J, et al. Características clínicas y factores asociados a mortalidad en pacientes adultos hospitalizados por COVID-19 en un hospital público de Lima, Perú. Preprint-Scielo 2021.
  39. Franceschi C, Garagnani P, Vitale G, Capri M, Salvioli S. Inflammaging and 'Garb-aging.' *Trends in Endocrinology & Metabolism* 2017; 28:199–212. <https://doi.org/10.1016/j.TEM.2016.09.005>.
  40. Campisi J, Kapahi P, Lithgow GJ, Melov S, Newman JC, Verdin E. From discoveries in ageing research to therapeutics for healthy ageing. *Nature* 2019; 571:183–92. <https://doi.org/10.1038/s41586-019-1365-2> PMID: 31292558
  41. Akbar AN, Gilroy DW. Aging immunity may exacerbate COVID-19. *Science* 2020; 369:256–7. <https://doi.org/10.1126/science.abb0762> PMID: 32675364
  42. Han H, Yang L, Liu R, Liu F, Liu F, Wu KL, et al. Prominent changes in blood coagulation of patients with SARS-CoV-2 infection. *Clin Chem Lab Med* 2020; 58:1116–20. <https://doi.org/10.1515/cclm-2020-0188> PMID: 32172226
  43. Henry BM, Aggarwal G, Wong J, Benoit S, Vikse J, Plebani M, et al. Lactate dehydrogenase levels predict coronavirus disease 2019 (COVID-19) severity and mortality: A pooled analysis. *Am J Emerg Med* 2020; 38:1722–6. <https://doi.org/10.1016/j.ajem.2020.05.073> PMID: 32738466
  44. Mas-Ubillus G, Ortiz PJ, Huaranga-Marcelo J, Sarzo-Miranda P, Muñoz-Aguirre P, Diaz-Ramos A, et al. High mortality among hospitalized adult patients with COVID-19 pneumonia in Peru: A single centre retrospective cohort study. *PLoS One* 2022; 17:e0265089. <https://doi.org/10.1371/journal.pone.0265089> PMID: 35259196
  45. Vences MA, Pareja-Ramos JJ, Otero P, Veramendi-Espinoza LE, Vega-Villafana M, Mogollón-Lavi J, et al. Factores asociados a mortalidad en pacientes hospitalizados con COVID-19: cohorte prospectiva en un hospital de referencia nacional de Perú. *Medwave* 2021; 21:e8231. <https://doi.org/10.5867/MEDWAVE.2021.06.8231>.
  46. Zhao Z, Chen A, Hou W, Graham JM, Li H, Richman PS, et al. Prediction model and risk scores of ICU admission and mortality in COVID-19. *PLoS One* 2020; 15:e0236618. <https://doi.org/10.1371/journal.pone.0236618> PMID: 32730358
  47. Tang N, Li D, Wang X, Sun Z. Abnormal coagulation parameters are associated with poor prognosis in patients with novel coronavirus pneumonia. *Journal of Thrombosis and Haemostasis* 2020; 18:844–7. <https://doi.org/10.1111/jth.14768> PMID: 32073213
  48. Manson JJ, Crooks C, Naja M, Ledlie A, Goulden B, Liddle T, et al. COVID-19-associated hyperinflammation and escalation of patient care: a retrospective longitudinal cohort study. *Lancet Rheumatol* 2020; 2:e594–602. [https://doi.org/10.1016/S2665-9913\(20\)30275-7](https://doi.org/10.1016/S2665-9913(20)30275-7) PMID: 32864628
  49. Garibaldi BT, Fiksel J, Muschelli J, Robinson ML, Rouhizadeh M, Perin J, et al. Patient Trajectories Among Persons Hospitalized for COVID-19: A Cohort Study. *Ann Intern Med* 2021; 174:33–41. <https://doi.org/10.7326/M20-3905> PMID: 32960645
  50. Berenguer J, Ryan P, Rodríguez-Baño J, Jarrín I, Carratalà J, Pachón J, et al. Characteristics and predictors of death among 4035 consecutively hospitalized patients with COVID-19 in Spain. *Clin Microbiol Infect* 2020; 26:1525–36. <https://doi.org/10.1016/j.cmi.2020.07.024> PMID: 32758659
  51. Dai M-F, Guo S-T, Ke Y-J, Wang B-Y, Yu F, Xu H, et al. The Use of Oral Anticoagulation Is Not Associated With a Reduced Risk of Mortality in Patients With COVID-19: A Systematic Review and Meta-Analysis of Cohort Studies. *Front Pharmacol* 2022; 0:977. <https://doi.org/10.3389/fphar.2022.781192> PMID: 35431952
  52. Bilaloglu S, Aphinyanaphongs Y, Jones S, Iturrate E, Hochman J, Berger JS. Thrombosis in Hospitalized Patients With COVID-19 in a New York City Health System. *JAMA* 2020; 324:799–801. <https://doi.org/10.1001/jama.2020.13372> PMID: 32702090
  53. Lodigiani C, Iapichino G, Carenzo L, Cecconi M, Ferrazzi P, Sebastian T, et al. Venous and arterial thromboembolic complications in COVID-19 patients admitted to an academic hospital in Milan, Italy. *Thromb Res* 2020; 191:9–14. <https://doi.org/10.1016/j.thromres.2020.04.024> PMID: 32353746
  54. Al-Samkari H, Karp Leaf RS, Dzik WH, Carlson JCT, Fogerty AE, Waheed A, et al. COVID-19 and coagulation: bleeding and thrombotic manifestations of SARS-CoV-2 infection. *Blood* 2020; 136:489–500. <https://doi.org/10.1182/blood.2020006520> PMID: 32492712

55. Moores LK, Tritschler T, Brosnahan S, Carrier M, Collen JF, Doerschug K, et al. Prevention, Diagnosis, and Treatment of VTE in Patients With Coronavirus Disease 2019: CHEST Guideline and Expert Panel Report. *Chest* 2020; 158:1143–63. <https://doi.org/10.1016/j.chest.2020.05.559> PMID: 32502594
56. Cui S, Chen S, Li X, Liu S, Wang F. Prevalence of venous thromboembolism in patients with severe novel coronavirus pneumonia. *Journal of Thrombosis and Haemostasis* 2020; 18:1421–4. <https://doi.org/10.1111/jth.14830> PMID: 32271988
57. Zhang C, Shen L, Le K-J, Pan M-M, Kong L-C, Gu Z-C, et al. Incidence of Venous Thromboembolism in Hospitalized Coronavirus Disease 2019 Patients: A Systematic Review and Meta-Analysis. *Front Cardiovasc Med* 2020; 0:151. <https://doi.org/10.3389/FCVM.2020.00151>.
58. Spiegelberg JP, van Gelder MMHJ, Maas ML, Hovens MMC, Esselink A, Dofferhoff ASM, et al. Prior use of therapeutic anticoagulation does not protect against COVID-19 related clinical outcomes in hospitalized patients: A propensity score-matched cohort study. *Br J Clin Pharmacol* 2021; 87:4839–47. <https://doi.org/10.1111/bcp.14877> PMID: 33899226
59. Ackermann M, Verleden SE, Kuehnel M, Haverich A, Welte T, Laenger F, et al. Pulmonary Vascular Endothelialitis, Thrombosis, and Angiogenesis in Covid-19. *N Engl J Med* 2020; 383:120–8. <https://doi.org/10.1056/NEJMoa2015432> PMID: 32437596
60. Varga Z, Flammer AJ, Steiger P, Haberecker M, Andermatt R, Zinkernagel AS, et al. Endothelial cell infection and endotheliitis in COVID-19. *Lancet* 2020; 395:1417–8. [https://doi.org/10.1016/S0140-6736\(20\)30937-5](https://doi.org/10.1016/S0140-6736(20)30937-5) PMID: 32325026
61. Aslan B, Akyüz A, Işık F, Çap M, İnci Ü, Kaya İ, et al. The effect of chronic DOAC treatment on clinical outcomes of hospitalized patients with COVID-19. *Int J Clin Pract* 2021;75. <https://doi.org/10.1111/ijcp.14467> PMID: 34107130
62. Hadid T, Kafri Z, Al-Katib A. Coagulation and anticoagulation in COVID-19. *Blood Rev* 2021;47. <https://doi.org/10.1016/j.blre.2020.100761> PMID: 33067035
63. Russo V, Bottino R, D'Andrea A, Silverio A, di Maio M, Golino P, et al. Chronic Oral Anticoagulation and Clinical Outcome in Hospitalized COVID-19 Patients. *Cardiovasc Drugs Ther* 2021. <https://doi.org/10.1007/s10557-021-07194-y> PMID: 33988835
64. Flam B, Wintzell V, Ludvigsson JF, Mårtensson J, Pasternak B. Direct oral anticoagulant use and risk of severe COVID-19. *J Intern Med* 2021; 289:411–9. <https://doi.org/10.1111/joim.13205> PMID: 33258156
